# Supplementary material for: Dual African Origins of Global Aedes aegypti s.l. Populations Revealed by Mitochondrial DNA
Source: PubMed Central journal article supplement (PMC3630099; doi:10.1371/journal.pntd.0002175), 2013-04-18

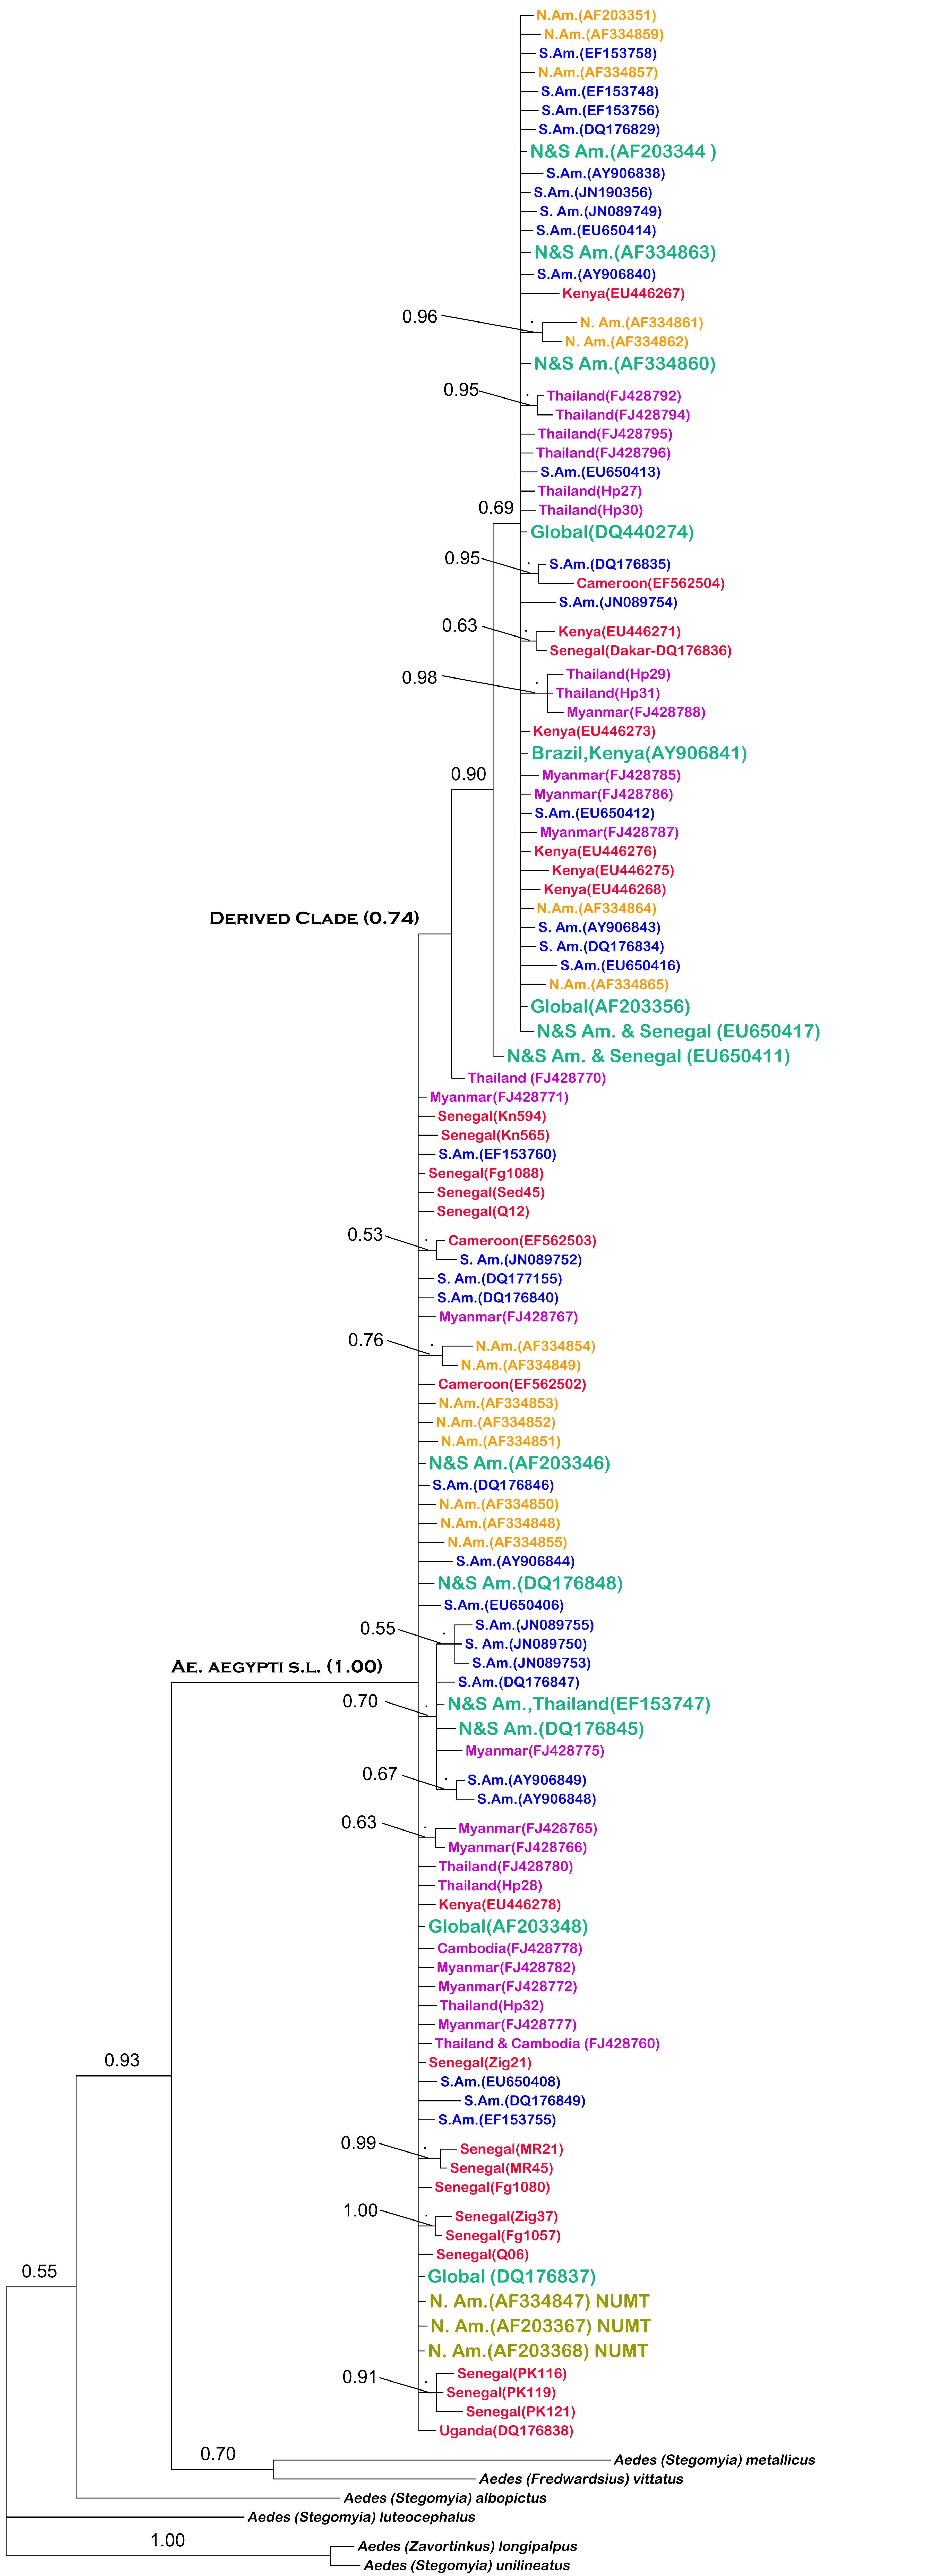

Supplement: pntd.0002175.s002.pdf [file pntd.0002175.s002.pdf]
